# Supplementary material
Source: Springer Nature journal article supplement (https://www.springermedizin.de/resource/supplementary/12885_2007_1011_MOESM3_ESM.pdf/9471908)

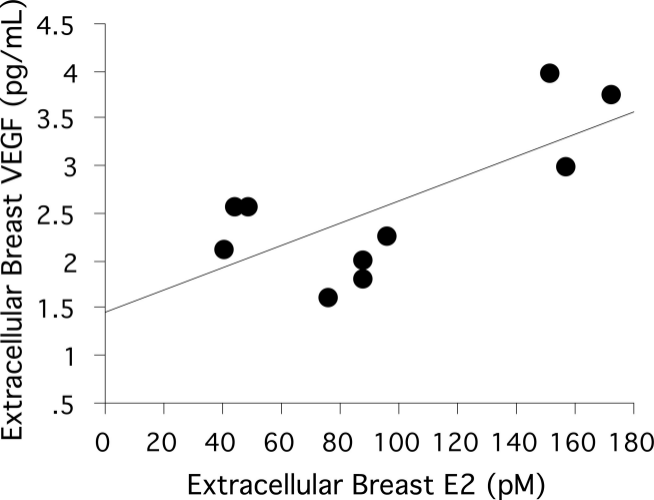

Supplement: MOESM3 [file 9471908]
